# Supplementary material for: Improved care and survival in severe malnutrition through eLearning
Source: PubMed Central journal article supplement (PMC6951232; doi:10.1136/archdischild-2018-316539), 2019-07-30
Supplement: archdischild-2018-316539supp004.pdf [file archdischild-2018-316539supp004.pdf]

## Supplementary file 4

**Table.** Changes in the assessment, diagnosis and management of SAM at eleven participating hospitals for the 12 months preintervention and 12 months postintervention

| Country                                                                           |         | Ghana                   |        |       |       |         |                            |         |        |       | Guatemala | El Salvador | Overall N (%)     |
|-----------------------------------------------------------------------------------|---------|-------------------------|--------|-------|-------|---------|----------------------------|---------|--------|-------|-----------|-------------|-------------------|
|                                                                                   |         | Malnutrition ward/units |        |       |       |         | Paediatric & general wards |         |        |       |           |             |                   |
| Healthcare institution <sup>1</sup>                                               |         | MCHH                    | SMiH   | EGH   | APH   | SPH     | KGH                        | SMaH    | KSH    | MGH   | HJP       | HNZ         |                   |
| <b>Number of cases analysed: 0-60m</b>                                            |         |                         |        |       |       |         |                            |         |        |       |           |             |                   |
| Pre                                                                               | Overall | 334                     | 52     | 41    | 19    | 80      | 206                        | 2503    | 287    | 110   | 133       | 188         | 3953              |
| Post                                                                              | Overall | 372                     | 111    | 55    | 64    | 153     | 238                        | 1782    | 220    | 74    | 212       | 442         | 3723              |
| <b>Number of cases with the requisite measurement data for WHO classification</b> |         |                         |        |       |       |         |                            |         |        |       |           |             |                   |
| Pre                                                                               | Overall | 165/334                 | 49/52  | 39/41 | 14/19 | 78/80   | 0/206                      | 0/2503  | 15/287 | 0/110 | 120/133   | 149/188     | 629/3953 (15.9%)  |
| Post                                                                              | Overall | 273/372                 | 51/111 | 49/55 | 63/64 | 153/153 | 33/238                     | 39/1782 | 0/220  | 0/74  | 203/212   | 436/442     | 1300/3723 (34.9%) |
| <b>Number of cases with reported severe acute malnutrition (SAM)</b>              |         |                         |        |       |       |         |                            |         |        |       |           |             |                   |
| Pre                                                                               | <6m     | 38/38                   | 1/6    | 2/2   | 2/2   | 19/19   | 0/8                        | 0/120   | 2/17   | 0/12  | 1/22      | 0/46        | 65/292 (22.3%)    |
| Post                                                                              | <6m     | 33/33                   | 16/16  | 1/4   | 4/4   | 27/27   | 2/6                        | 0/200   | 0/9    | 0/3   | 0/17      | 0/119       | 83/438 (18.9%)    |
| Pre                                                                               | 6-60m   | 293/293                 | 6/46   | 23/37 | 12/16 | 60/60   | 2/184                      | 0/2383  | 11/267 | 0/98  | 13/111    | 0/142       | 420/3637 (11.5%)  |
| Post                                                                              | 6-60m   | 339/339                 | 93/93  | 21/51 | 60/60 | 126/126 | 33/229                     | 21/1582 | 6/211  | 0/71  | 20/195    | 0/323       | 719/3280 (21.9%)  |
| <b>Number of cases classified based on WHO SAM criteria (6-60m)</b>               |         |                         |        |       |       |         |                            |         |        |       |           |             |                   |
| <b>Total number of cases classified<sup>2</sup></b>                               |         |                         |        |       |       |         |                            |         |        |       |           |             |                   |
| Pre                                                                               | 6-60m   | 293                     | 15     | 27    | 12    | 60      | 2                          | 0       | 13     | 0     | 17        | 5           | 444               |
| Post                                                                              | 6-60m   | 339                     | 93     | 23    | 60    | 126     | 33                         | 30      | 6      | 0     | 32        | 44          | 786               |
| <b>Number of unclassifiable SAM</b>                                               |         |                         |        |       |       |         |                            |         |        |       |           |             |                   |
| Pre                                                                               | 6-60m   | 138/293                 | 2/15   | 0/27  | 2/12  | 1/60    | 2/2                        | 0/0     | 5/13   | 0/0   | 1/17      | 0/5         | 151/444 (34.0%)   |
| Post                                                                              | 6-60m   | 72/339                  | 51/93  | 0/23  | 1/60  | 0/126   | 4/33                       | 0/30    | 6/6    | 0/0   | 1/32      | 0/44        | 135/786 (17.2%)   |
| <b>Number of matched SAM</b>                                                      |         |                         |        |       |       |         |                            |         |        |       |           |             |                   |
| Pre                                                                               | 6-60m   | 122/293                 | 0/15   | 20/27 | 10/12 | 49/60   | 0/2                        | 0/0     | 5/13   | 0/0   | 3/17      | 0/5         | 209/444 (47.1%)   |
| Post                                                                              | 6-60m   | 207/339                 | 34/93  | 16/23 | 52/60 | 116/126 | 13/33                      | 12/30   | 0/6    | 0/0   | 10/32     | 0/44        | 460/786 (58.5%)   |
| <b>Number of false SAM</b>                                                        |         |                         |        |       |       |         |                            |         |        |       |           |             |                   |
| Pre                                                                               | 6-60m   | 33/293                  | 4/15   | 3/27  | 0/12  | 10/60   | 0/2                        | 0/0     | 1/13   | 0/0   | 9/17      | 0/5         | 60/444 (13.5%)    |
| Post                                                                              | 6-60m   | 60/339                  | 8/93   | 5/23  | 7/60  | 10/126  | 16/33                      | 9/30    | 0/6    | 0/0   | 9/32      | 0/44        | 124/786 (15.8%)   |

| <b>Number of missed SAM cases</b>                                                                                          |         |        |       |      |      |       |       |        |       |       |       |        |                |
|----------------------------------------------------------------------------------------------------------------------------|---------|--------|-------|------|------|-------|-------|--------|-------|-------|-------|--------|----------------|
| Pre                                                                                                                        | 6-60m   | 0/293  | 9/15  | 4/27 | 0/12 | 0/60  | 0/2   | 0/0    | 2/13  | 0/0   | 4/17  | 5/5    | 24/444 (5.4%)  |
| Post                                                                                                                       | 6-60m   | 0/339  | 0/93  | 2/23 | 0/60 | 0/126 | 0/33  | 9/30   | 0/6   | 0/0   | 12/32 | 44/44  | 67/786 (8.5%)  |
| <b>Mortality</b>                                                                                                           |         |        |       |      |      |       |       |        |       |       |       |        |                |
| <b>Number of deaths from all causes (number of deaths/number of cases analysed 0-60m)</b>                                  |         |        |       |      |      |       |       |        |       |       |       |        |                |
| Pre                                                                                                                        | Overall | N/A    | N/A   | N/A  | N/A  | N/A   | 3/206 | 0/2503 | 4/287 | 0/110 | 0/133 | 0/188  | 7/3427 (0.2%)  |
| Post                                                                                                                       | Overall | N/A    | N/A   | N/A  | N/A  | N/A   | 0/238 | 1/1782 | 0/220 | 0/74  | 0/212 | 0/442  | 1/2968 (0.03%) |
| <b>Case fatality rates for children with SAM<sup>3</sup></b>                                                               |         |        |       |      |      |       |       |        |       |       |       |        |                |
| Pre                                                                                                                        | Overall | 12/298 | 0/12  | 4/26 | 0/14 | 6/69  | 0/2   | 0/0    | 4/14  | 0/0   | 0/9   | 0/5    | 26/449 (5.8%)  |
| Post                                                                                                                       | Overall | 2/312  | 1/101 | 0/19 | 3/57 | 8/143 | 0/19  | 0/21   | 0/6   | 0/0   | 0/23  | 0/44   | 14/745 (1.9%)  |
| <b>SAM-related morbidity</b>                                                                                               |         |        |       |      |      |       |       |        |       |       |       |        |                |
| <b>Number of cases diagnosed with acute respiratory infection in whom SAM was identified</b>                               |         |        |       |      |      |       |       |        |       |       |       |        |                |
| Pre                                                                                                                        | Overall | 38/44  | 0/8   | 1/1  | 0/0  | 0/0   | 1/29  | 0/377  | 1/52  | 0/39  | 0/3   | 3/67   | 44/620 (7.1%)  |
| Post                                                                                                                       | Overall | 23/23  | 17/18 | 0/0  | 0/0  | 16/17 | 3/41  | 0/314  | 1/81  | 0/22  | 1/27  | 20/199 | 81/742 (10.9%) |
| <b>Number of cases diagnosed with gastroenteritis in whom SAM was identified</b>                                           |         |        |       |      |      |       |       |        |       |       |       |        |                |
| Pre                                                                                                                        | Overall | 22/25  | 1/5   | 2/2  | 1/1  | 3/3   | 0/18  | 0/342  | 1/34  | 0/22  | 1/10  | 3/125  | 34/587 (5.8%)  |
| Post                                                                                                                       | Overall | 13/13  | 20/22 | 0/0  | 0/0  | 32/34 | 0/14  | 1/351  | 0/57  | 0/15  | 5/43  | 24/167 | 95/716 (13.3%) |
| <b>Other outcome change</b>                                                                                                |         |        |       |      |      |       |       |        |       |       |       |        |                |
| <b>Number of SAM admissions referred from Paediatric/Malnutrition wards to Komfo Anokye Teaching Hospital (Ghana only)</b> |         |        |       |      |      |       |       |        |       |       |       |        |                |
| Pre                                                                                                                        | Overall | 28/298 | 0/12  | 0/26 | 0/14 | 0/69  | 0/2   | 0/0    | 1/14  | 0/0   | N/A   | N/A    | 29/435 (6.7%)  |
| Post                                                                                                                       | Overall | 8/312  | 0/101 | 0/19 | 0/57 | 1/143 | 0/19  | 0/21   | 0/6   | 0/0   | N/A   | N/A    | 9/678 (1.3%)   |

<sup>1</sup> MCHH: Maternal and Child Health Hospital, SMiH: St Michael's Hospital, EGH: Ejura Government Hospital, APH: Agogo Presbyterian Hospital, SPH: St Patrick's Hospital, KGH: Kogongo Government Hospital, SMaH: St Martin's Hospital, KSH, Kumasi South Hospital, MGH: Mankranso Government Hospital.

<sup>2</sup> Include reported SAM cases and cases with no SAM reported but of which anthropometric data met WHO SAM criteria.

<sup>3</sup> Include SAM cases aged 6-60m that met WHO criteria (matched, unclassifiable, missed), and SAM cases aged <6m.

SAM, severe acute malnutrition
